# Supplementary material for: Identification of potential transcription factors that enhance human iPSC generation
Source: PubMed Central journal article supplement (PMC7738555; doi:10.1038/s41598-020-78932-9), 2020-12-15
Supplement: 41598_2020_78932_MOESM1_ESM.pdf [file 41598_2020_78932_MOESM1_ESM.pdf]

## **Identification of potential transcription factors that enhance human iPSC generation**

Nuha T. Swaidan, Salam Salloum-Asfar, Freshteh Palangi, Khaoula Errafii, Nada H. Soliman,

Ahmed T. Aboughalia, Abdul Haseeb S. Wali, Sara A. Abdulla, Mohamed M. Emara

## Supplementary Figures

**Supplementary Fig. 1:** A representative Bioanalyzer trace showing the 18S and 28S rRNA peaks from isolated RNA. RNA integrity number (RIN) of more than 8 indicates intact RNA.

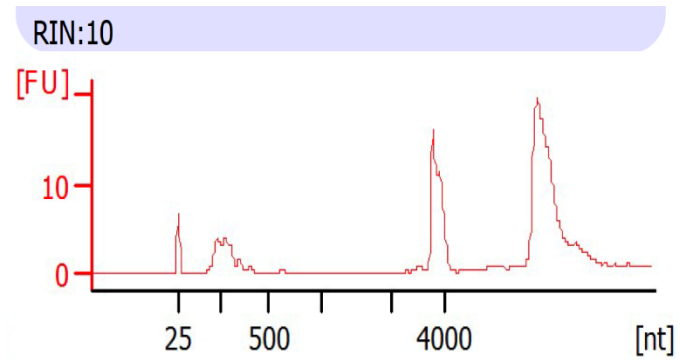

**Supplementary Fig. 2:** Represents the full-length western blots that are presented in the study.

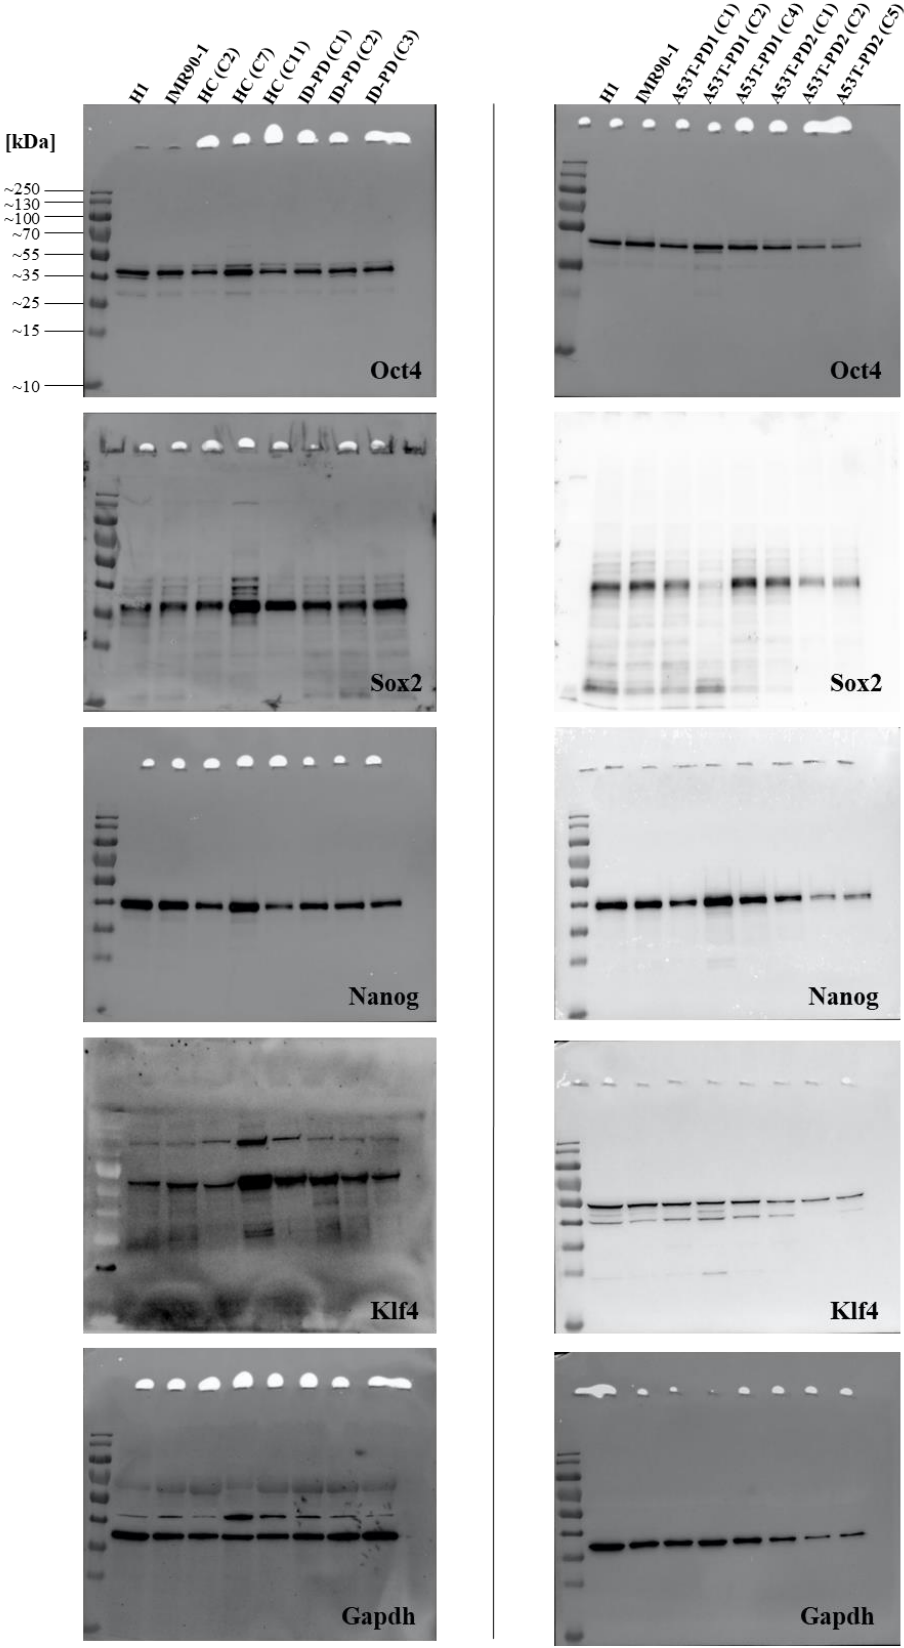

## Supplementary Tables

**Supplementary Table S1:** Percentage of RNA-Seq raw reads that were mapped to reference genome.

| Sample ID            | Raw reads mapped to reference genome (%) |
|----------------------|------------------------------------------|
| H1                   | 94.87                                    |
| IMR90-1              | 94.65                                    |
| HC fibroblasts       | 97.67                                    |
| HC C2                | 95.99                                    |
| HC C7                | 93.50                                    |
| HC C11               | 94.52                                    |
| ID-PD fibroblasts    | 97.50                                    |
| ID-PD C1             | 84.39                                    |
| ID-PD C2             | 94.34                                    |
| ID-PD C3             | 94.86                                    |
| A53T-PD1 fibroblasts | 97.74                                    |
| A53T-PD1 C1          | 93.97                                    |
| A53T-PD1 C2          | 95.69                                    |
| A53T-PD1 C4          | 95.43                                    |
| A53T-PD2 fibroblasts | 98.10                                    |
| A53T-PD2 C1          | 93.19                                    |
| A53T-PD2 C2          | 94.21                                    |
| A53T-PD2 C5          | 95.38                                    |

**Supplementary Table S2:** List of differentially expressed genes in A53T-PD2 iPSC clones based on RNA sequencing data.

| Name       | Fold change | P-value     | FDR value   |
|------------|-------------|-------------|-------------|
| ZNF728     | 4175.703048 | 0.000231117 | 0.043512851 |
| AC003973.3 | 3367.628971 | 0           | 0           |
| CIDEB      | 1700.171603 | 0.00107254  | 0.122032444 |
| FLG        | 1363.102578 | 0.001764359 | 0.169813654 |
| ZNF208     | 1305.127873 | 0           | 0           |
| ZNF729     | 935.7046356 | 4.18178E-10 | 3.20548E-07 |
| ZNF492     | 728.7081705 | 7.81208E-12 | 7.6214E-09  |
| ZNF676     | 638.0101472 | 2.09079E-11 | 1.86978E-08 |
| ZNF99      | 477.6023122 | 2.37168E-10 | 1.88531E-07 |
| ZNF560     | 435.1961126 | 0           | 0           |
| AL049557.1 | 383.674555  | 0.011003979 | 0.527055561 |
| TBC1D3G    | 358.9605485 | 0.011903082 | 0.551783702 |
| ZNF98      | 341.3960763 | 9.94982E-13 | 1.25619E-09 |
| AC026464.6 | 261.0861926 | 0.016119328 | 0.639499345 |
| AC026954.2 | 234.9932472 | 0.01967113  | 0.709582287 |
| ZNF257     | 233.6975513 | 0           | 0           |
| MAS1       | 198.6456991 | 0.026321087 | 0.827129545 |
| TRIM4      | 182.3098391 | 0           | 0           |
| CTSF       | 159.5441622 | 0           | 0           |
| TBC1D3F    | 152.6619963 | 0.030774474 | 0.891411287 |
| POTEC      | 144.6539291 | 0.031872069 | 0.896638364 |
| SDR42E1    | 135.9065754 | 1.27336E-11 | 1.18827E-08 |
| CYP4F2     | 135.0601366 | 0.033275687 | 0.914956806 |
| CSAG1      | 134.130065  | 0.036798552 | 0.944953293 |
| MAGEE2     | 131.6418566 | 0.033766397 | 0.917339976 |
| ZNF572     | 111.633181  | 2.78488E-12 | 2.9886E-09  |
| ZNF662     | 103.5783804 | 0           | 0           |
| ZNF723     | 82.82155436 | 3.29336E-06 | 0.001382606 |
| IFIT2      | 81.83319498 | 7.41892E-08 | 4.30357E-05 |
| PUS7L      | 81.02486171 | 0           | 0           |
| C9orf64    | 71.77147418 | 0           | 0           |
| MT1G       | 66.47351298 | 0           | 0           |
| PABPC3     | 52.52405677 | 9.46535E-07 | 0.000423239 |
| MT1H       | 52.04243509 | 3.12195E-13 | 4.46709E-10 |
| TBC1D3C    | 45.87910899 | 1.3237E-06  | 0.000579806 |
| NKX2-5     | 41.70828245 | 0.002484618 | 0.213011956 |
| IRAK4      | 41.57684601 | 1.22125E-15 | 2.1843E-12  |
| NLRP2      | 40.91512145 | 2.79474E-11 | 2.39934E-08 |
| SLC30A8    | 40.07003407 | 0.000654056 | 0.090567793 |

|         |             |             |             |
|---------|-------------|-------------|-------------|
| PRAC1   | 36.66180788 | 0.000780606 | 0.102159437 |
| MT1F    | 36.39857639 | 4.10783E-15 | 6.78202E-12 |
| FOXC1   | 31.61899504 | 5.12826E-05 | 0.013261177 |
| ZNF528  | 31.57398319 | 0           | 0           |
| PAX7    | 31.31636481 | 1.41936E-05 | 0.004546821 |
| MT1E    | 30.99982308 | 1.74616E-12 | 2.0821E-09  |
| NKAPL   | 29.06136958 | 4.51458E-05 | 0.012265361 |
| IFI44   | 28.81183477 | 0.002543517 | 0.213113482 |
| ZIC1    | 28.62336484 | 0.000110968 | 0.024553722 |
| TLX1    | 28.42666557 | 0.001707295 | 0.165061632 |
| PTPN20  | 26.56917706 | 1.10892E-05 | 0.00379259  |
| FAM24B  | 25.24101351 | 9.8555E-05  | 0.022503033 |
| ISLR2   | 24.0033989  | 9.64265E-06 | 0.003449338 |
| HMX1    | 23.95065086 | 9.51262E-05 | 0.021953684 |
| TBX5    | 23.3091353  | 0.00099185  | 0.11696749  |
| HOXB1   | 23.17791617 | 0.001179383 | 0.128492839 |
| HOXB2   | 23.05736997 | 0.002343478 | 0.206139641 |
| C2CD6   | 22.78699343 | 0.004189722 | 0.293869309 |
| MT1M    | 21.60579603 | 0.003206811 | 0.242921853 |
| PITX2   | 20.53255195 | 0.000343156 | 0.056655041 |
| PRAC2   | 19.56746273 | 0.004611187 | 0.314190208 |
| ANXA2R  | 19.52410173 | 0.005370783 | 0.341761384 |
| PCDHA11 | 18.69958857 | 0.007314665 | 0.414511414 |
| TLE7    | 18.66632014 | 0.000702872 | 0.094939835 |
| HOXB13  | 18.53174045 | 0.003542188 | 0.262158543 |
| BAHCC1  | 18.0669678  | 3.68219E-06 | 0.001491147 |
| TRIM43B | 17.65601142 | 0.014255606 | 0.6074815   |
| GBX2    | 16.98551553 | 1.1752E-07  | 6.46754E-05 |
| SOX14   | 16.83644978 | 0.001116862 | 0.12485006  |
| SIX3    | 16.11847697 | 7.0321E-05  | 0.017348282 |
| ZIC4    | 15.75241268 | 0.000892573 | 0.109769715 |
| PAX5    | 15.57242359 | 0.000432482 | 0.066779589 |
| TRIM49  | 15.29740625 | 0.021113392 | 0.733263311 |
| PON3    | 15.17093703 | 0.013230715 | 0.596577392 |
| TBX1    | 14.92933673 | 0.000999881 | 0.117064938 |
| SCNN1B  | 14.89819409 | 0.00089864  | 0.109769715 |
| CRISP2  | 14.61342899 | 0.013011153 | 0.587912369 |
| HRNR    | 14.38198888 | 0.013469457 | 0.598429316 |
| MECOM   | 13.37904335 | 0.000441122 | 0.067343655 |
| PAX6    | 12.60022439 | 0.005443795 | 0.344661244 |
| LMX1B   | 11.97756072 | 0.00025951  | 0.048016018 |
| ZFP57   | 11.79182347 | 4.24684E-07 | 0.000202555 |
| GDF7    | 11.77335021 | 0.000461676 | 0.06929331  |

|            |             |             |             |
|------------|-------------|-------------|-------------|
| CCL5       | 10.93913055 | 0.010882308 | 0.524869625 |
| C4orf51    | 10.85134026 | 0.001229317 | 0.130538472 |
| MT2A       | 10.80644939 | 1.66772E-08 | 1.08468E-05 |
| AC005943.1 | 10.77798729 | 4.03399E-05 | 0.011392308 |
| EN2        | 10.72216904 | 0.036847257 | 0.944953293 |
| MYO16      | 10.58362399 | 0.00079523  | 0.103126402 |
| AC006978.2 | 10.43577088 | 0.006733958 | 0.394063402 |
| GAD2       | 10.39954831 | 0.002295265 | 0.203567248 |
| PLD6       | 10.37566561 | 0.000710673 | 0.094939835 |
| TSHZ1      | 10.34185352 | 0.000973134 | 0.115394373 |
| WNT10B     | 10.32332887 | 0.000366809 | 0.059194069 |
| HIST1H3C   | 10.2752027  | 0.03298469  | 0.913000145 |
| MAP3K7CL   | 10.05051588 | 0.011371353 | 0.535226665 |
| TCEAL6     | 9.981720829 | 0.011666111 | 0.544423374 |
| AC010547.4 | 9.94790133  | 0.037515955 | 0.949956294 |
| SP5        | 9.701002696 | 0.030358166 | 0.891238703 |
| PCDHGA3    | 9.112959607 | 0.001153106 | 0.126271011 |
| GDA        | 9.082759214 | 4.65183E-14 | 7.13159E-11 |
| CD36       | 8.792341451 | 0.001131368 | 0.12516776  |
| IRX6       | 8.765623445 | 0.023298355 | 0.769148647 |
| PTPRB      | 8.663962241 | 0.000320084 | 0.054959749 |
| AC139491.7 | 8.516755894 | 0.006439591 | 0.384994245 |
| EOMES      | 8.441923428 | 0.004506905 | 0.309047001 |
| DMBX1      | 8.28637296  | 0.000360042 | 0.058542206 |
| ZNF559     | 8.278017311 | 8.84175E-05 | 0.020937539 |
| HBA2       | 8.132679506 | 0.022061696 | 0.750071031 |
| INSM1      | 7.921116042 | 0.00020356  | 0.03866373  |
| SAMD9      | 7.791377582 | 0.010071896 | 0.498094693 |
| GATA5      | 7.749397807 | 0.002083194 | 0.191075176 |
| OAS2       | 7.740967886 | 0.009220759 | 0.468969537 |
| HIST2H2BF  | 7.674699871 | 8.34552E-06 | 0.003035931 |
| AC008758.1 | 7.621438392 | 0.008268341 | 0.442624232 |
| FOXD1      | 7.610551097 | 0.004919565 | 0.325773147 |
| GSTM5      | 7.604190602 | 1.37451E-05 | 0.004529962 |
| C17orf50   | 7.585313029 | 0.020776309 | 0.72642353  |
| HHLA1      | 7.568325356 | 4.11626E-12 | 4.20702E-09 |
| SP8        | 7.300236611 | 1.06618E-05 | 0.003751368 |
| ZNF705D    | 7.238115659 | 0.021522553 | 0.737920998 |
| KAZALD1    | 7.204202616 | 0.00256177  | 0.213113482 |
| PAX8       | 7.149063865 | 0.027318152 | 0.844855179 |
| PHOX2A     | 7.095020523 | 0.008209848 | 0.442624232 |
| PCDH15     | 7.023985966 | 0.00156123  | 0.153709581 |
| IRX4       | 6.930996453 | 0.002970342 | 0.233967692 |

|            |             |             |             |
|------------|-------------|-------------|-------------|
| CXCL1      | 6.909426226 | 0.003849016 | 0.275371467 |
| ZNF578     | 6.901241077 | 5.44732E-06 | 0.002051157 |
| ZNF502     | 6.781816052 | 0.00010962  | 0.024508117 |
| NKX6-2     | 6.77975651  | 0.036841396 | 0.944953293 |
| IFIT3      | 6.773152913 | 0.001109618 | 0.124689719 |
| NPAS3      | 6.646288095 | 0.001519565 | 0.150932619 |
| CLEC18B    | 6.598205571 | 0.029027141 | 0.871523493 |
| ZNF829     | 6.583364132 | 0.000533671 | 0.07739312  |
| CH25H      | 6.394255834 | 0.013585268 | 0.598429316 |
| C17orf51   | 6.302781423 | 0.000698305 | 0.094939835 |
| GRM6       | 6.282913549 | 0.007575633 | 0.42355763  |
| C1GALT1C1L | 6.274810878 | 0.009283877 | 0.469952473 |
| C7orf57    | 6.260682511 | 0.005303536 | 0.340807749 |
| UTF1       | 6.179312086 | 3.31781E-05 | 0.009975538 |
| AC020951.1 | 6.175757289 | 0.003811659 | 0.273610856 |
| DND1       | 6.064959859 | 3.46532E-05 | 0.010188515 |
| PRSS3      | 6.026079658 | 0.037021147 | 0.944953293 |
| CTAGE8     | 6.002952491 | 0.00030772  | 0.053695847 |
| PIK3R6     | 5.989834065 | 0.008076812 | 0.44110079  |
| ZNF726     | 5.938131517 | 0.001697277 | 0.164835575 |
| VENTX      | 5.840426102 | 0.000143376 | 0.029841653 |
| LRFN5      | 5.826216623 | 1.1309E-05  | 0.00379259  |
| BHMT2      | 5.772520748 | 0.017236275 | 0.661792796 |
| AL445363.3 | 5.772303437 | 0.021509946 | 0.737920998 |
| MAEL       | 5.758338134 | 0.022601483 | 0.759289111 |
| CNTFR      | 5.724765097 | 0.003711991 | 0.268250717 |
| TSPYL5     | 5.671627424 | 0.000370409 | 0.059328961 |
| CYP4F22    | 5.661973783 | 0.00133266  | 0.13563397  |
| MDGA2      | 5.501838505 | 0.000164912 | 0.032237336 |
| DOK6       | 5.488660251 | 0.01073931  | 0.519139211 |
| MAGEB2     | 5.30270953  | 0.022927709 | 0.767702676 |
| SKOR2      | 5.266554379 | 0.019148425 | 0.696580762 |
| HLA-DQB1   | 5.24798954  | 4.13356E-06 | 0.001642938 |
| ZNF880     | 5.21713964  | 4.95665E-08 | 3.03956E-05 |
| BTK        | 5.176241044 | 0.007028182 | 0.405499645 |
| OLIG3      | 5.063168312 | 0.021590323 | 0.739057609 |
| AC110285.7 | 5.022261935 | 0.007009761 | 0.405499645 |
| CER1       | 5.015619213 | 0.0197191   | 0.710119205 |
| ABHD12B    | 4.980628629 | 3.3464E-05  | 0.009975538 |
| HR         | 4.935032333 | 0.033814738 | 0.917339976 |
| ZNF585B    | 4.879054295 | 2.84893E-08 | 1.79843E-05 |
| TAL1       | 4.848748134 | 0.036724338 | 0.944953293 |
| MT1X       | 4.823702994 | 1.64997E-07 | 8.63738E-05 |



|               |             |             |             |
|---------------|-------------|-------------|-------------|
| CCL28         | 4.814940392 | 0.00758695  | 0.42355763  |
| GATA2         | 4.746616389 | 0.010494119 | 0.513064389 |
| SATB2         | 4.722260408 | 0.00071217  | 0.094939835 |
| ZNF559-ZNF177 | 4.707022597 | 0.006626997 | 0.390756129 |
| NFIA          | 4.668407464 | 0.008350636 | 0.442624232 |
| AL139260.3    | 4.65011305  | 0.016436087 | 0.646519874 |
| ZNF630        | 4.608679353 | 0.001284044 | 0.133317986 |
| LTB           | 4.598178824 | 0.01851981  | 0.680395259 |
| AC006064.6    | 4.576481856 | 0.005735673 | 0.359452872 |
| NNAT          | 4.570818985 | 0.001219443 | 0.130436984 |
| PTH1R         | 4.552838612 | 0.023582543 | 0.770398956 |
| PCDHB5        | 4.550486234 | 0.000337966 | 0.056230765 |
| WNT3          | 4.516249303 | 0.001066284 | 0.122032444 |
| CCDC152       | 4.470144983 | 2.92486E-05 | 0.008968044 |
| ZNF439        | 4.458187001 | 0.000124588 | 0.02728602  |
| NANOGP8       | 4.388448953 | 2.10626E-09 | 1.55885E-06 |
| TNRC18        | 4.373118374 | 7.44871E-06 | 0.002756407 |
| ZXDA          | 4.348090112 | 0.008545495 | 0.449206677 |
| BNC1          | 4.34068214  | 0.011475863 | 0.538963802 |
| AC112702.1    | 4.25577798  | 0.003693675 | 0.267975703 |
| TMEM200B      | 4.213050037 | 0.000538341 | 0.077546327 |
| RIMBP2        | 4.152408853 | 0.015968123 | 0.635851243 |
| PCDHB15       | 4.140126401 | 0.000399773 | 0.062630112 |
| Z99129.3      | 4.065886677 | 0.001452455 | 0.144995535 |
| ZNF454        | 4.007793739 | 0.007334213 | 0.414511414 |
| DAPL1         | 3.998272316 | 0.01245067  | 0.56978407  |
| ZNF568        | 3.986854087 | 0.000527602 | 0.077033445 |
| RAB4B-EGLN2   | 3.981831503 | 0.037676221 | 0.949956294 |
| NLRP7         | 3.961488742 | 0.00043109  | 0.066779589 |
| CCDC33        | 3.92077894  | 0.013749467 | 0.599806505 |
| IL9R          | 3.860073249 | 0.021472959 | 0.737920998 |
| PKIB          | 3.859533584 | 1.39299E-05 | 0.004529962 |
| AC100868.1    | 3.858274312 | 0.002868064 | 0.229691264 |
| TFAP2C        | 3.854419626 | 0.00044241  | 0.067343655 |
| ARSE          | 3.829508031 | 0.011359708 | 0.535226665 |
| HHEX          | 3.820609385 | 0.024605541 | 0.791767221 |
| AC004696.2    | 3.809242953 | 0.020058639 | 0.712779074 |
| SNTG1         | 3.783480936 | 0.035592065 | 0.936927096 |
| RBM46         | 3.777328847 | 0.002641293 | 0.217267769 |
| TLL2          | 3.706404037 | 0.001221536 | 0.130436984 |
| ZNF229        | 3.703993248 | 0.025955889 | 0.821668511 |
| XKR9          | 3.700185462 | 0.031577722 | 0.896638364 |
| ZNF850        | 3.626641545 | 2.34968E-12 | 2.65427E-09 |

|              |             |             |             |
|--------------|-------------|-------------|-------------|
| ARRB1        | 3.616738834 | 0.000319151 | 0.054959749 |
| VWC2         | 3.583313764 | 0.034068457 | 0.918607144 |
| PDGFA        | 3.550875028 | 1.12098E-05 | 0.00379259  |
| PCDHA1       | 3.538026175 | 0.010614226 | 0.516583085 |
| SLC35E2A     | 3.523851399 | 3.34974E-06 | 0.001382606 |
| LPAR6        | 3.522165018 | 0.00321436  | 0.242921853 |
| ZADH2        | 3.492064788 | 0.004118362 | 0.289811126 |
| CEBPZOS      | 3.484561501 | 4.97259E-06 | 0.001905835 |
| AC008738.7   | 3.476299926 | 0.037070804 | 0.944953293 |
| AL031777.3   | 3.471540103 | 0.030987398 | 0.892923077 |
| ADAMTS9      | 3.471082713 | 0.018150608 | 0.677648256 |
| TGIF2-RAB5IF | 3.45978252  | 0.003442099 | 0.256520065 |
| IFIT1        | 3.456784161 | 0.009443581 | 0.473569122 |
| COX7A1       | 3.448273197 | 0.033933286 | 0.918423848 |
| AL391005.1   | 3.433689734 | 0.023997552 | 0.776861932 |
| CRIP1        | 3.428289553 | 0.031652073 | 0.896638364 |
| AC135050.2   | 3.426309121 | 0.02310321  | 0.768781685 |
| ZNF441       | 3.412665483 | 0.031602853 | 0.896638364 |
| CYP2B6       | 3.408679506 | 0.017162166 | 0.660128248 |
| MLLT6        | 3.403702642 | 4.51143E-05 | 0.012265361 |
| CAT          | 3.360839184 | 0.03838911  | 0.959191469 |
| BMP7         | 3.338009187 | 0.00121058  | 0.130436984 |
| PCDHA7       | 3.327526629 | 0.016677906 | 0.653207821 |
| ZNF177       | 3.307007085 | 0.03921069  | 0.971617814 |
| POMZP3       | 3.306942532 | 4.80758E-05 | 0.012898126 |
| CDH6         | 3.262972635 | 0.003477359 | 0.258251085 |
| NEFL         | 3.229241702 | 0.003693435 | 0.267975703 |
| CXCL5        | 3.216989994 | 0.00471329  | 0.31912099  |
| PCDHA9       | 3.213893276 | 0.007723335 | 0.428096828 |
| ZNF516       | 3.203134055 | 0.000907556 | 0.109783584 |
| CRLF1        | 3.189687407 | 0.001004185 | 0.117064938 |
| SLC39A4      | 3.12884262  | 0.005042668 | 0.329971891 |
| ZNF717       | 3.110173426 | 0.028731303 | 0.868535151 |
| LHX5         | 3.060858599 | 0.014424769 | 0.611515242 |
| IRX1         | 3.036741703 | 0.015586007 | 0.6255371   |
| FBP1         | 3.029824644 | 0.018342826 | 0.677648256 |
| CPT1A        | 2.987592845 | 0.005525765 | 0.348822062 |
| RAI1         | 2.979282328 | 0.008312518 | 0.442624232 |
| SOCS2        | 2.936613945 | 1.24918E-07 | 6.70277E-05 |
| IGF2_1       | 2.933072333 | 0.02600979  | 0.822162199 |
| HIST2H4B     | 2.924242895 | 0.013978105 | 0.604863054 |
| C17orf107    | 2.898201211 | 0.013748349 | 0.599806505 |
| IER3         | 2.850696025 | 0.008172324 | 0.442624232 |

|            |             |             |             |
|------------|-------------|-------------|-------------|
| TRPC6      | 2.84859816  | 0.017575826 | 0.667663623 |
| ZNF878     | 2.843253412 | 0.009380043 | 0.472591242 |
| DPPA5      | 2.836218743 | 0.033418916 | 0.914956806 |
| CGAS       | 2.831375322 | 0.00290706  | 0.231948797 |
| KCNH5      | 2.819404942 | 0.014173979 | 0.60721779  |
| ZNF382     | 2.801974335 | 0.01107785  | 0.527192679 |
| CDRT4      | 2.775091191 | 0.039630568 | 0.976568185 |
| EPOP       | 2.766235679 | 0.008840696 | 0.459437909 |
| ELAVL4     | 2.761416387 | 0.036940259 | 0.944953293 |
| AP001972.5 | 2.760369034 | 0.026799363 | 0.837255787 |
| FOXB1      | 2.735071417 | 0.020001542 | 0.712779074 |
| DRD4       | 2.714531435 | 0.026130016 | 0.824747855 |
| FAM86B2    | 2.706405966 | 0.018358024 | 0.677648256 |
| ZNF595     | 2.653745692 | 0.035180114 | 0.935651536 |
| DNAJA4     | 2.653342216 | 0.034411054 | 0.922052985 |
| AC011447.7 | 2.651287072 | 7.18368E-08 | 4.28287E-05 |
| FOXI2      | 2.648229649 | 0.031062983 | 0.893706159 |
| ID2        | 2.636934508 | 0.00016522  | 0.032237336 |
| FBN2       | 2.615859447 | 8.87721E-05 | 0.020937539 |
| ZNF737     | 2.611641362 | 0.003928923 | 0.277862646 |
| GDF3       | 2.583153557 | 0.009028598 | 0.463466273 |
| PCDHB3     | 2.562934584 | 0.013711464 | 0.599806505 |
| NETO1      | 2.556708176 | 0.000761675 | 0.10029349  |
| NODAL      | 2.542658535 | 0.006006369 | 0.367278352 |
| ZNF585A    | 2.474041379 | 0.000880695 | 0.109769715 |
| RORB       | 2.466042099 | 0.018695788 | 0.682428056 |
| ZNF283     | 2.460656043 | 0.009966818 | 0.495180123 |
| HES3       | 2.419600974 | 0.023098071 | 0.768781685 |
| NFATC1     | 2.414386668 | 0.027700055 | 0.852978896 |
| CCSAP      | 2.389455728 | 0.00058963  | 0.083809463 |
| PRODH      | 2.388868305 | 0.0010746   | 0.122032444 |
| NEURL1     | 2.387593136 | 0.029112915 | 0.872032857 |
| ZFP3       | 2.380778815 | 0.036257345 | 0.942043625 |
| EIF3CL     | 2.344362697 | 0.005339    | 0.341761384 |
| SULT1A4    | 2.330155749 | 0.023216973 | 0.769148647 |
| H2AFY2     | 2.325795195 | 0.003770732 | 0.271581259 |
| LRRC3B     | 2.31936138  | 0.030686549 | 0.891238703 |
| CCDC169    | 2.318424514 | 0.009768007 | 0.487559827 |
| RIPK4      | 2.314840731 | 0.022527546 | 0.759289111 |
| ZFHX3      | 2.29848547  | 0.023477332 | 0.770398956 |
| ARHGAP28   | 2.271141219 | 9.28904E-05 | 0.021670726 |
| ZNF600     | 2.268824031 | 0.018294816 | 0.677648256 |
| PCDHA3     | 2.266079116 | 0.029490438 | 0.876666593 |

|          |              |             |             |
|----------|--------------|-------------|-------------|
| PEG10    | 2.244002693  | 0.000132418 | 0.028420956 |
| ADAMTS16 | 2.24158412   | 0.00904567  | 0.463466273 |
| ULK4     | 2.23651951   | 0.005382069 | 0.341761384 |
| SLC1A3   | 2.232575753  | 0.001081789 | 0.122202296 |
| NETO2    | 2.229212052  | 0.000270816 | 0.049679771 |
| SALL3    | 2.201732003  | 0.000325752 | 0.05506139  |
| TRABD2B  | 2.195891558  | 0.037376368 | 0.949956294 |
| MN1      | 2.15901452   | 0.033470089 | 0.914956806 |
| AGPAT3   | 2.153466033  | 0.014057249 | 0.60584485  |
| REC8     | 2.140434105  | 0.001143797 | 0.125893902 |
| ALDH1L2  | 2.125818676  | 0.00253342  | 0.213113482 |
| RHOBTB3  | 2.116422061  | 0.011954206 | 0.552780629 |
| COL9A3   | 2.116233994  | 4.39981E-06 | 0.001716964 |
| B3GNT7   | 2.09312221   | 0.004756422 | 0.321028575 |
| STOX2    | 2.061477118  | 0.000458936 | 0.06929331  |
| CHAC1    | 2.04437265   | 0.008378745 | 0.442624232 |
| RGS14    | 2.037496286  | 0.035557537 | 0.936927096 |
| PCDHA10  | 2.021631009  | 0.01342184  | 0.597661746 |
| FAT3     | 2.014638241  | 5.09317E-07 | 0.000237641 |
| ZFP69B   | 2.010891971  | 0.020577624 | 0.724028747 |
| SEPT6    | 2.010299208  | 0.007223493 | 0.412118411 |
| RORA     | -2.027373407 | 0.023236647 | 0.769148647 |
| TNS1     | -2.033440042 | 0.007092903 | 0.408136666 |
| ATP1A2   | -2.044919017 | 0.007112173 | 0.408151253 |
| PTGR2    | -2.059136077 | 0.00082318  | 0.105648826 |
| ASTN1    | -2.084631355 | 0.015538661 | 0.6255371   |
| PPFIA4   | -2.084753581 | 0.02792285  | 0.855750528 |
| NOVA2    | -2.090069244 | 0.006315586 | 0.379695848 |
| ATP8B3   | -2.092953518 | 0.03775582  | 0.949956294 |
| KRT7     | -2.096137964 | 0.009047774 | 0.463466273 |
| HS3ST5   | -2.106226226 | 0.018898119 | 0.688642325 |
| HAPLN3   | -2.10671913  | 7.47363E-05 | 0.018228023 |
| SERPINF1 | -2.111317921 | 0.001615419 | 0.158318482 |
| TCF15    | -2.111851434 | 0.023919849 | 0.775516196 |
| TCEAL3   | -2.119539713 | 0.008099051 | 0.441192724 |
| BEX2     | -2.150036915 | 6.32153E-05 | 0.015776616 |
| CCDC160  | -2.15640202  | 0.037973033 | 0.953234153 |
| GRIN2A   | -2.161961257 | 0.023213271 | 0.769148647 |
| SNCG     | -2.17797942  | 0.013737721 | 0.599806505 |
| NFASC    | -2.18191892  | 0.000614032 | 0.08557767  |
| SH3BGR   | -2.190161745 | 0.015002554 | 0.62282363  |
| SULT1A1  | -2.208058829 | 0.028518308 | 0.863312319 |
| GRPR     | -2.209331929 | 0.014007843 | 0.604930231 |

|                |              |             |             |
|----------------|--------------|-------------|-------------|
| NAAA           | -2.210011497 | 0.015115493 | 0.624721085 |
| FCGBP          | -2.210423601 | 0.014223588 | 0.6074815   |
| TCL1B          | -2.254417758 | 0.014854851 | 0.621500309 |
| SPNS2          | -2.258866094 | 0.035967003 | 0.93912383  |
| AKR1C3         | -2.264585146 | 0.020977928 | 0.729739511 |
| BTN3A3         | -2.269932597 | 0.034324937 | 0.921876223 |
| VIPR1          | -2.280702873 | 0.008926988 | 0.462801806 |
| DGKB           | -2.285964144 | 0.034348548 | 0.921876223 |
| BTN3A2         | -2.298074064 | 0.020869198 | 0.727872869 |
| MUM1L1         | -2.300616186 | 0.027275782 | 0.844855179 |
| FAM71F1        | -2.302638377 | 0.035226373 | 0.935722321 |
| POSTN          | -2.339015011 | 0.039384406 | 0.971617814 |
| CRB2           | -2.342330427 | 0.006738167 | 0.394063402 |
| ECSCR          | -2.344928093 | 0.037664218 | 0.949956294 |
| ADAMTS4        | -2.359492882 | 0.0013334   | 0.13563397  |
| DCX            | -2.359795238 | 0.001322688 | 0.13563397  |
| TSPAN7         | -2.378287828 | 0.0036957   | 0.267975703 |
| DACT3          | -2.38590912  | 0.033506781 | 0.914956806 |
| CD4            | -2.393712232 | 0.006556612 | 0.387670979 |
| ACOXL          | -2.421833974 | 0.010671244 | 0.518183052 |
| NPIPA2         | -2.430912573 | 0.000297972 | 0.052421161 |
| POU3F1         | -2.431271707 | 0.000910662 | 0.109783584 |
| S100A14        | -2.431426836 | 0.036298284 | 0.942043625 |
| JPH4           | -2.433966357 | 1.10179E-08 | 7.38993E-06 |
| MAPK8IP2       | -2.437629883 | 0.01748814  | 0.667480651 |
| CCDC169-SOHLH2 | -2.442985849 | 0.032325846 | 0.902223195 |
| FRRS1L         | -2.465721232 | 0.025146849 | 0.803164912 |
| SYP            | -2.479064559 | 0.007207075 | 0.412118411 |
| KLK6           | -2.501139925 | 0.031427313 | 0.896638364 |
| SMIM10L2A      | -2.529924375 | 0.003227758 | 0.243078518 |
| BCL2L14        | -2.530820592 | 0.026266701 | 0.827129545 |
| BTG2           | -2.545265215 | 0.002529927 | 0.213113482 |
| DNM3           | -2.545678048 | 0.017853091 | 0.673428619 |
| SCUBE1         | -2.547067514 | 0.004712191 | 0.31912099  |
| CHST13         | -2.54944047  | 0.033715551 | 0.917157009 |
| LRFN2          | -2.5641843   | 0.017434959 | 0.667480651 |
| RASA4          | -2.574999906 | 0.001525993 | 0.150932619 |
| NRXN2          | -2.579000009 | 0.00197862  | 0.187079854 |
| SORCS3         | -2.584543396 | 0.012484841 | 0.57013223  |
| AL022318.4     | -2.588413881 | 0.035636427 | 0.936927096 |
| AC148477.5     | -2.627925683 | 0.029827785 | 0.880596636 |
| VIL1           | -2.62867303  | 0.005936418 | 0.365437729 |
| TMEM151B       | -2.630918415 | 0.00014599  | 0.029841653 |

|                |              |             |             |
|----------------|--------------|-------------|-------------|
| PAPLN          | -2.635858918 | 1.67425E-06 | 0.000718689 |
| TLR5           | -2.643428166 | 0.015231345 | 0.625067621 |
| CACNA1E        | -2.651251454 | 0.014960215 | 0.622269561 |
| RAI2           | -2.653528564 | 0.029403372 | 0.875290663 |
| PKDCC          | -2.655270007 | 0.000601369 | 0.084498821 |
| LHFPL6         | -2.656687639 | 0.003935622 | 0.277862646 |
| AC013717.1     | -2.664656417 | 0.034361505 | 0.921876223 |
| TNS4           | -2.664852608 | 0.033561765 | 0.915293724 |
| FAM107A        | -2.667357913 | 0.035516466 | 0.936927096 |
| KCNJ6          | -2.679687872 | 0.031401462 | 0.896638364 |
| PAMR1          | -2.706612485 | 0.002309284 | 0.203967738 |
| NPIPA7         | -2.71648715  | 0.007758918 | 0.428096828 |
| SEZ6           | -2.720135075 | 0.020464243 | 0.722407968 |
| CD79B          | -2.743692125 | 0.014647178 | 0.616416454 |
| MPZL2          | -2.757224174 | 0.015211421 | 0.625067621 |
| PKNOX2         | -2.761510532 | 0.003684794 | 0.267975703 |
| LCN10          | -2.762759026 | 0.023578039 | 0.770398956 |
| MAGED4         | -2.76721943  | 0.022605681 | 0.759289111 |
| ARHGAP30       | -2.790057065 | 0.036771356 | 0.944953293 |
| AC008012.1     | -2.801789475 | 0.006152203 | 0.371956994 |
| CAVIN3         | -2.817543558 | 0.000142279 | 0.029841653 |
| C16orf89       | -2.845601546 | 0.028167009 | 0.859870393 |
| SCARA5         | -2.867427763 | 0.036399316 | 0.943524771 |
| WFIKKN1        | -2.870577992 | 0.002222328 | 0.199572452 |
| SCG2           | -2.885006754 | 0.010490214 | 0.513064389 |
| SBK2           | -2.888154128 | 0.011758947 | 0.547466985 |
| SUSD4          | -2.894589369 | 0.004221846 | 0.294543135 |
| CTNNA3         | -2.900282156 | 0.027898143 | 0.855750528 |
| KCNK2          | -2.905409079 | 0.01518641  | 0.625067621 |
| COL1A1         | -2.912157929 | 1.8837E-07  | 9.40231E-05 |
| S100A4         | -2.925366763 | 0.000915588 | 0.109783584 |
| SNAP91         | -2.936540256 | 0.021409594 | 0.737582868 |
| PAQR6          | -2.950583229 | 0.002864354 | 0.229691264 |
| CCKBR          | -2.984885234 | 0.000145914 | 0.029841653 |
| APLN           | -2.98782591  | 0.015854624 | 0.632505204 |
| EIF5AL1        | -3.046915543 | 0.037665764 | 0.949956294 |
| P2RX1          | -3.071907936 | 0.019863459 | 0.71054903  |
| CYP1B1         | -3.076965168 | 0.000826958 | 0.105648826 |
| MYOF           | -3.080163201 | 0.004881266 | 0.324354846 |
| EEF1AKMT4-ECE2 | -3.085872984 | 0.032614573 | 0.907920329 |
| C11orf86       | -3.087137565 | 0.03540573  | 0.936197678 |
| SBK3           | -3.096684205 | 0.026485866 | 0.831090863 |
| EDN1           | -3.098154047 | 0.028790892 | 0.868701937 |

|            |              |             |             |
|------------|--------------|-------------|-------------|
| CNTN2      | -3.100649242 | 0.017539259 | 0.667480651 |
| SPTLC3     | -3.101024571 | 0.018346463 | 0.677648256 |
| PTPRH      | -3.1082461   | 0.02578925  | 0.818892251 |
| TEX11      | -3.123141894 | 0.020343691 | 0.719335485 |
| KLK7       | -3.128180688 | 0.007353189 | 0.414511414 |
| APELA      | -3.138092238 | 7.46601E-07 | 0.000340942 |
| ALOX15B    | -3.152111088 | 0.023845893 | 0.774288035 |
| FAM43B     | -3.18222018  | 0.004948145 | 0.325773147 |
| MYLPF      | -3.184412045 | 0.038925249 | 0.968079524 |
| SERPINF2   | -3.186624567 | 0.004982501 | 0.327031856 |
| RGS9       | -3.196507313 | 0.015330418 | 0.6255371   |
| DPEP1      | -3.214185827 | 0.008389497 | 0.442624232 |
| VAV1       | -3.243947219 | 0.000580046 | 0.082996879 |
| STC1       | -3.244192479 | 5.86511E-09 | 4.06074E-06 |
| CD34       | -3.251367806 | 0.033687763 | 0.917157009 |
| GABRA1     | -3.266594425 | 0.035872029 | 0.938928493 |
| ACTG2      | -3.266641093 | 0.016859812 | 0.657409538 |
| SCRT2      | -3.280895851 | 0.018360046 | 0.677648256 |
| CUZD1      | -3.281096325 | 0.00600141  | 0.367278352 |
| CPNE5      | -3.287705188 | 0.011214543 | 0.531341596 |
| MX2        | -3.294723131 | 0.017088422 | 0.659656117 |
| LHX1       | -3.29905708  | 0.016446902 | 0.646519874 |
| LRRC15     | -3.314934621 | 0.033120993 | 0.914898166 |
| TTPA       | -3.3199244   | 0.018134578 | 0.677648256 |
| DOK7       | -3.34120275  | 0.029362637 | 0.875290663 |
| HKDC1      | -3.351864604 | 0.036494633 | 0.944854415 |
| PRELP      | -3.366675425 | 0.017715481 | 0.670792215 |
| AL355315.1 | -3.408125177 | 0.032518053 | 0.906409054 |
| C6orf118   | -3.437942806 | 0.01513558  | 0.624721085 |
| BTBD17     | -3.454220749 | 0.002449901 | 0.212025084 |
| CLEC14A    | -3.454871668 | 0.038560277 | 0.960697171 |
| PKP3       | -3.456243216 | 6.0153E-05  | 0.01518898  |
| MS4A15     | -3.458142738 | 0.037724688 | 0.949956294 |
| ABCC3      | -3.468117716 | 0.023567626 | 0.770398956 |
| PDYN       | -3.471915289 | 0.014727565 | 0.617378356 |
| PARVG      | -3.51280413  | 0.014137899 | 0.606883459 |
| KCNN4      | -3.516380722 | 0.013606369 | 0.598429316 |
| SMIM24     | -3.517093545 | 0.000395997 | 0.062494662 |
| AL590560.1 | -3.522334976 | 0.031875091 | 0.896638364 |
| HLA-G      | -3.537344306 | 0.00319852  | 0.242921853 |
| TRPC4      | -3.548259039 | 0.01386408  | 0.602357776 |
| OPTC       | -3.604680145 | 0.002524268 | 0.213113482 |
| SMOC1      | -3.617770395 | 0.006688812 | 0.393320451 |

|            |              |             |             |
|------------|--------------|-------------|-------------|
| ANKS4B     | -3.621434498 | 0.036978431 | 0.944953293 |
| TIE1       | -3.645352095 | 0.002023885 | 0.187710464 |
| TNNT2      | -3.678933778 | 0.006147609 | 0.371956994 |
| CACNA1S    | -3.702282774 | 0.026317602 | 0.827129545 |
| IQSEC3     | -3.704884113 | 0.00194529  | 0.184742343 |
| EIF4E1B    | -3.757561348 | 0.002974325 | 0.233967692 |
| RD3        | -3.75767689  | 0.010040647 | 0.497696077 |
| MB         | -3.761402748 | 0.013816138 | 0.601492443 |
| KIF19      | -3.766169524 | 0.002989935 | 0.234207938 |
| MAGEA2B    | -3.776460292 | 0.030649538 | 0.891238703 |
| ROPN1      | -3.784850065 | 0.023787236 | 0.774288035 |
| FRMPD2     | -3.839699231 | 0.029689306 | 0.877715657 |
| IQCN       | -3.855734481 | 0.030994162 | 0.892923077 |
| HGF        | -3.885579056 | 0.006505849 | 0.386044498 |
| GALNT9     | -3.903154461 | 0.007756437 | 0.428096828 |
| CHRND      | -3.942618734 | 0.021252283 | 0.734521326 |
| ALAS2      | -3.982584074 | 0.021184565 | 0.7334747   |
| SHOX2      | -3.986039814 | 0.039977041 | 0.982181997 |
| GJA5       | -4.019567829 | 0.001385734 | 0.139756917 |
| JPH2       | -4.027356232 | 0.001273283 | 0.13330965  |
| TRIM50     | -4.03526151  | 0.029306549 | 0.875290663 |
| AC008982.1 | -4.037842473 | 0.035002144 | 0.932073227 |
| AVPR1B     | -4.054249193 | 0.021746902 | 0.740878995 |
| GLIS1      | -4.057196074 | 0.03579472  | 0.938048929 |
| GJB5       | -4.112214136 | 0.006906531 | 0.402812183 |
| AIPL1      | -4.125846521 | 0.001988991 | 0.187126377 |
| PCDH8      | -4.238207627 | 0.006119343 | 0.371956994 |
| ANGPT4     | -4.239367319 | 0.008315035 | 0.442624232 |
| APBB1IP    | -4.278430007 | 0.01978643  | 0.71054903  |
| KCNT1      | -4.29630005  | 0.011015851 | 0.527055561 |
| F10        | -4.48421649  | 0.000602354 | 0.084498821 |
| GNA15      | -4.504343013 | 0.004226776 | 0.294543135 |
| C7         | -4.540060133 | 0.03706798  | 0.944953293 |
| MATN4      | -4.593809205 | 0.000284437 | 0.051301476 |
| AMH        | -4.612551898 | 0.000186196 | 0.036002864 |
| ADRB3      | -4.672852999 | 0.014445242 | 0.611515242 |
| MAGEA4     | -4.689923076 | 0.000891437 | 0.109769715 |
| CCDC177    | -4.749294083 | 0.002182506 | 0.196819829 |
| KLK5       | -4.8009389   | 0.000673321 | 0.092637765 |
| ASCL5      | -4.819166769 | 0.002443297 | 0.212025084 |
| MAP1LC3C   | -4.845711859 | 0.000283755 | 0.051301476 |
| FGFBP1     | -4.87055288  | 0.019961078 | 0.712779074 |
| ART3       | -5.063928433 | 0.003059139 | 0.238757463 |



|            |              |             |             |
|------------|--------------|-------------|-------------|
| LAPTM5     | -5.072218587 | 0.006495874 | 0.386044498 |
| PTPN7      | -5.136905212 | 0.010230799 | 0.504032266 |
| TTL10      | -5.2246248   | 0.006928898 | 0.4030215   |
| LRRC24     | -5.466102991 | 0.020568643 | 0.724028747 |
| RNASE1     | -5.61711081  | 0.000797604 | 0.103126402 |
| FETUB      | -5.637253084 | 0.032081134 | 0.900677574 |
| NNMT       | -5.63870593  | 0.032315881 | 0.902223195 |
| CYP1A1     | -5.723195526 | 0.001386955 | 0.139756917 |
| RBPJL      | -5.771544748 | 0.00319293  | 0.242921853 |
| AC011472.5 | -5.935466634 | 0.022086609 | 0.750071031 |
| ADRA2A     | -6.041439523 | 0.000147472 | 0.029860255 |
| NPIP7      | -6.061733725 | 0.006991557 | 0.405499645 |
| ITIH3      | -6.232362453 | 0.031733572 | 0.896638364 |
| CYP2A7     | -6.250183739 | 0.023037821 | 0.768781685 |
| VSTM1      | -6.274866704 | 0.008369767 | 0.442624232 |
| CD300A     | -6.300477131 | 0.000157195 | 0.031239535 |
| XPNPEP2    | -6.522860639 | 0.003632272 | 0.267901919 |
| FMO1       | -6.864059208 | 0.01495981  | 0.622269561 |
| FMOD       | -6.910304923 | 0.000131714 | 0.028420956 |
| AL079342.3 | -7.069010671 | 0.027281144 | 0.844855179 |
| NPTX1      | -7.092583246 | 1.60546E-10 | 1.32531E-07 |
| H1FOO      | -7.097144514 | 0.024094065 | 0.778536938 |
| OR52A1     | -7.209967166 | 0.000144456 | 0.029841653 |
| APOBEC3H   | -7.227415374 | 0.000834797 | 0.106019242 |
| AL136454.1 | -7.962908419 | 0.015510941 | 0.6255371   |
| AL360181.3 | -8.219349568 | 0.017720691 | 0.670792215 |
| AC097637.1 | -8.491493828 | 0.018412607 | 0.677855541 |
| MAGEA2     | -8.570094938 | 0.001128407 | 0.12516776  |
| OR2T8      | -8.59084872  | 0.015760842 | 0.629934753 |
| CD3D       | -8.715782015 | 0.016842037 | 0.657409538 |
| SOHLH1     | -9.127715268 | 0.036931132 | 0.944953293 |
| FAM71E2    | -9.129836912 | 0.030201571 | 0.89040703  |
| PGM5       | -9.132344893 | 0.034053541 | 0.918607144 |
| TRIM29     | -9.265995054 | 0.001833533 | 0.17568358  |
| PDE11A_2   | -9.691540091 | 0.010738507 | 0.519139211 |
| FKBP1C     | -9.693421222 | 0.008393424 | 0.442624232 |
| XCR1       | -9.866950114 | 0.005931933 | 0.365437729 |
| RGPD1      | -10.13223919 | 2.75293E-05 | 0.008563199 |
| FXYD2      | -10.56265125 | 0.005640892 | 0.355045323 |
| PASD1      | -10.60368151 | 0.021698103 | 0.740391711 |
| TRAC       | -10.76522878 | 3.79163E-05 | 0.01099727  |
| AL031847.2 | -11.02141457 | 4.47123E-05 | 0.012265361 |
| SMYD1      | -11.06261309 | 0.000257225 | 0.048007102 |

|            |              |             |             |
|------------|--------------|-------------|-------------|
| SMIM38     | -11.16062787 | 0.001902537 | 0.181485089 |
| MYT1L      | -11.41741319 | 0.000327119 | 0.05506139  |
| UTS2       | -11.46611844 | 0.002261736 | 0.202068153 |
| OR2A12     | -11.78827924 | 0.019806452 | 0.71054903  |
| BPIFB4     | -11.90012113 | 0.019369031 | 0.703413709 |
| NPIPA8     | -12.10638583 | 1.84645E-07 | 9.40231E-05 |
| HBA1       | -13.15830563 | 0.002975967 | 0.233967692 |
| DHRS2      | -14.20243995 | 7.79787E-08 | 4.40436E-05 |
| CES1       | -14.24797379 | 3.50975E-09 | 2.51099E-06 |
| CHL1       | -16.78225136 | 0.01410681  | 0.606762471 |
| RGPD2      | -18.00157709 | 3.94679E-05 | 0.011294653 |
| AC011479.1 | -19.43644422 | 0.003268291 | 0.245270389 |
| PRR33      | -19.6983416  | 0.00626658  | 0.377807911 |
| TRBC1      | -20.66642851 | 4.92906E-05 | 0.012954965 |
| TPSD1      | -22.33091243 | 0.002803785 | 0.226231743 |
| ZIM2       | -25.0081157  | 0.004836899 | 0.324354846 |
| AC068631.2 | -30.00048717 | 0.000108762 | 0.024508117 |
| AF241726.2 | -35.43853693 | 0.039956053 | 0.982181997 |
| FGF5       | -35.4942535  | 0.028964646 | 0.871523493 |
| VCY1B      | -36.02747468 | 0.036633429 | 0.944953293 |
| CSAG2      | -40.17711067 | 0.030775556 | 0.891411287 |
| RHOXF2     | -40.41504785 | 0.02341205  | 0.769514288 |
| ARL2-SNX15 | -41.43600979 | 0.031851834 | 0.896638364 |
| SAGE1      | -41.43600979 | 0.031826936 | 0.896638364 |
| AC127029.3 | -43.20887279 | 0.023830718 | 0.774288035 |
| APOA2      | -45.58300745 | 0.02032948  | 0.719335485 |
| KCNC2      | -50.25809061 | 0.016994341 | 0.659583272 |
| AC009133.6 | -50.28352967 | 0.016179254 | 0.640210055 |
| SIRPB1     | -84.78232928 | 0.006511117 | 0.386044498 |
| AC010531.1 | -94.69173801 | 0.005380715 | 0.341761384 |
| SPATA31A5  | -95.10557756 | 0.008560105 | 0.449206677 |
| CT45A10    | -122.6583775 | 0.004600245 | 0.314190208 |
| OR2A4      | -134.0066348 | 0.002558288 | 0.213113482 |
| MTRNR2L1   | -153.5505327 | 0.003112468 | 0.242039512 |
| AC139530.2 | -160.5113387 | 0.003161819 | 0.242921853 |
| AC008695.1 | -176.880139  | 2.31677E-07 | 0.000113011 |
| CXCL11     | -183.3630061 | 0.00133062  | 0.13563397  |
| AC048338.1 | -243.6904673 | 0.001404179 | 0.140831284 |
| TBC1D3D    | -427.4234094 | 0.000377308 | 0.059986427 |
| PEG3       | -436.0755845 | 8.27338E-13 | 1.10982E-09 |
| AL035078.4 | -1200.023002 | 2.27593E-05 | 0.007183581 |

**Supplementary Table S3:** List of the 91 differentially expressed genes that showed an FDR  $\leq 0.05$  in A53T-PD2 iPSC clones.

| Name       | Chromosome | Region                          | HC vs. IMR90-1 Fold change | HC vs. IMR90-1 P-value | HC vs. IMR90-1 FDR | A53T-PD1 vs. IMR90-1 - Fold change | A53T-PD1 vs. IMR90-1 - P-value | A53T-PD1 vs. IMR90-1 - FDR | A53T-PD2 vs. IMR90-1 - Fold change | A53T-PD2 vs. IMR90-1 - P-value | A53T-PD2 vs. IMR90-1 - FDR | ID-PD vs. IMR90-1 - Fold change | ID-PD vs. IMR90-1 - P-value | ID-PD vs. IMR90-1 - FDR |
|------------|------------|---------------------------------|----------------------------|------------------------|--------------------|------------------------------------|--------------------------------|----------------------------|------------------------------------|--------------------------------|----------------------------|---------------------------------|-----------------------------|-------------------------|
| AC003973.3 | 19         | complement (21965708..21968529) | 2843.161565                | 1.941E-12              | 5.95139E-09        | 1147.342462                        | 4.5209E-10                     | 1.61719E-06                | 3215.13364                         | 8.8396E-13                     | 2.872E-09                  | 4154.05977                      | 1.65E-13                    | 4.183E-10               |
| ZNF208     | 19         | complement (21932958..22010949) | 1111.806989                | 0                      | 0                  | 505.9070063                        | 3.1641E-14                     | 1.6978E-10                 | 1319.874271                        | 0                              | 0                          | 1591.40892                      | 0                           | 0                       |
| ZNF729     | 19         | 22286408..22317176              | 1396.388334                | 1.84284E-08            | 2.32664E-05        | 705.4693923                        | 3.4844E-07                     | 0.000415472                | 937.4849206                        | 1.0591E-07                     | 8.1181E-05                 | 2011.59522                      | 3.43E-09                    | 4.325E-06               |
| ZNF492     | 19         | 22634324..22667670              | 433.257223                 | 1.49313E-07            | 0.000160235        | 230.8766142                        | 2.5169E-06                     | 0.002250821                | 778.5546218                        | 8.35E-09                       | 9.4324E-06                 | 727.966473                      | 1.18E-08                    | 1.054E-05               |
| ZNF676     | 19         | complement (22179091..22215775) | 883.4225628                | 2.41884E-09            | 3.24473E-06        | 567.7359744                        | 2.4397E-08                     | 4.76023E-05                | 642.7013208                        | 1.295E-08                      | 1.3898E-05                 | 1083.42911                      | 7.93E-10                    | 1.135E-06               |
| ZNF99      | 19         | complement (22752183..22784107) | 513.8891199                | 2.23925E-07            | 0.000218459        | 223.7016485                        | 7.2494E-06                     | 0.005019139                | 511.8680986                        | 2.2819E-07                     | 0.00016848                 | 597.95419                       | 1.13E-07                    | 8.117E-05               |
| ZNF560     | 19         | complement (9466507..9498607)   | 359.7193489                | 2.37921E-13            | 1.0213E-09         | 86.10954242                        | 3.0472E-08                     | 5.45022E-05                | 472.7234218                        | 1.7764E-14                     | 7.6252E-11                 | 519.917832                      | 6.99E-15                    | 2.502E-11               |
| ZNF98      | 19         | complement (22391019..22532485) | 359.8925954                | 2.18791E-08            | 2.60884E-05        | 178.1744126                        | 8.3843E-07                     | 0.000782401                | 342.4279315                        | 2.8762E-08                     | 2.5722E-05                 | 517.869444                      | 2.81E-09                    | 3.765E-06               |
| ZNF257     | 19         | 22052452..22091480              | 173.5621143                | 2.81642E-10            | 5.0374E-07         | 65.25192404                        | 3.2674E-07                     | 0.000412516                | 247.6077561                        | 1.5438E-11                     | 3.0123E-08                 | 209.489616                      | 6.22E-11                    | 1.027E-07               |
| CTSF       | 11         | complement (66563463..66568841) | 159.1791615                | 9.99201E-16            | 5.36146E-12        | 126.0839586                        | 1.8208E-14                     | 1.30264E-10                | 170.0399643                        | 4.4409E-16                     | 2.3829E-12                 | 106.336695                      | 1.45E-13                    | 4.183E-10               |
| TRIM4      | 7          | complement (99876958..99919600) | 170.6607023                | 1.02129E-12            | 3.65E-09           | 83.14678133                        | 9.0322E-10                     | 2.76939E-06                | 165.7032594                        | 1.3813E-12                     | 3.2942E-09                 | 142.28385                       | 6.29E-12                    | 1.124E-08               |
| SDR42E1    | 16         | complement (81988855..82011488) | 190.9818592                | 7.2663E-12             | 1.94946E-08        | 50.82854126                        | 3.0988E-07                     | 0.000412516                | 137.6966645                        | 1.33E-10                       | 2.3788E-07                 | 275.624889                      | 2.28E-13                    | 4.899E-10               |
| ZNF572     | 8          | 124973298..124979389            | 116.3044764                | 2.52341E-10            | 4.92363E-07        | 70.47116163                        | 1.5741E-08                     | 3.37853E-05                | 113.2503252                        | 3.2009E-10                     | 4.6067E-07                 | 109.231335                      | 4.4E-10                     | 6.753E-07               |
| ZNF662     | 3          | 42905731..42917641              | 77.06535915                | 2.03436E-09            | 2.91089E-06        | 36.00059739                        | 7.9238E-07                     | 0.000773034                | 97.96635854                        | 2.5057E-10                     | 4.137E-07                  | 62.2009302                      | 1.23E-08                    | 1.057E-05               |
| ZNF723     | 19         | 22832321..22858667              | 179.5592188                | 5.12894E-07            | 0.000423394        | 1.327694786                        | 0.79843819                     | 0.999973169                | 83.49949301                        | 1.8895E-05                     | 0.00664824                 | 111.53596                       | 5.16E-06                    | 0.001978                |
| IFIT2      | 10         | 89283694..89309276              | 86.28483122                | 6.5207E-05             | 0.022943254        | 18.34314339                        | 0.00928188                     | 0.784319071                | 82.17324294                        | 7.8467E-05                     | 0.02105184                 | 4.92870532                      | 0.156662                    | 0.9999755               |
| PUS7L      | 12         | complement (43718993..43758817) | 64.87641838                | 0                      | 0                  | 63.36108878                        | 0                              | 0                          | 77.10773006                        | 0                              | 0                          | 63.0298543                      | 0                           | 0                       |
| C9orf64    | 9          | complement (83938311..83956986) | 57.4828941                 | 8.94121E-11            | 1.91905E-07        | 25.5858799                         | 2.2077E-07                     | 0.000338453                | 74.94734419                        | 4.8808E-12                     | 1.0476E-08                 | 75.7130283                      | 4.38E-12                    | 8.54E-09                |
| MT1G       | 16         | complement (56666731..56668065) | 75.81638832                | 1.66062E-07            | 0.000169724        | -1.15061573                        | 0.86916313                     | 0.999973169                | 68.11059486                        | 3.3303E-07                     | 0.00022337                 | 22.1118005                      | 0.000184                    | 0.0346832               |
| PABPC3     | 13         | 25095868..25099254              | 64.65500229                | 4.15406E-07            | 0.000383939        | 41.16298253                        | 6.6567E-06                     | 0.004762412                | 52.89844314                        | 1.4854E-06                     | 0.000797                   | 73.7786314                      | 1.79E-07                    | 0.0001203               |
| MT1H       | 16         | 56669814..56671129              | 61.55136629                | 2.58583E-06            | 0.001585704        | 1.340200278                        | 0.74649255                     | 0.999973169                | 50.90122833                        | 7.352E-06                      | 0.00309403                 | 13.9704568                      | 0.002705                    | 0.2015805               |
| IRAK4      | 12         | 43758944..43789543              | 33.46484061                | 0                      | 0                  | 33.05234293                        | 0                              | 0                          | 42.18239902                        | 0                              | 0                          | 37.3167174                      | 0                           | 0                       |
| NLRP2      | 19         | 54953130..55001142              | 24.77811617                | 2.3991E-05             | 0.010727497        | 14.12651557                        | 0.00049352                     | 0.121752549                | 41.22025803                        | 9.8801E-07                     | 0.00055226                 | 22.188918                       | 4.53E-05                    | 0.0110496               |

|            |    |                                      |             |             |             |             |            |             |             |            |            |            |          |           |
|------------|----|--------------------------------------|-------------|-------------|-------------|-------------|------------|-------------|-------------|------------|------------|------------|----------|-----------|
| MT1F       | 16 | 56657694..56660698                   | 22.38453129 | 0.000108218 | 0.032259451 | -1.6179178  | 0.56437345 | 0.999973169 | 36.64125419 | 7.2445E-06 | 0.00309403 | 9.53998975 | 0.00506  | 0.2966417 |
| ZNF528     | 19 | 52397849..52418412                   | 21.97253297 | 3.12741E-10 | 5.16335E-07 | 6.424527629 | 0.00016282 | 0.052157233 | 33.26849834 | 9.367E-13  | 2.872E-09  | 15.8078312 | 1.98E-08 | 1.571E-05 |
| FOXC1      | 6  | 1609972..1613897                     | -2.16735019 | 0.38518134  | 0.99997305  | -1.7024338  | 0.54928322 | 0.999973169 | 31.93030327 | 4.3691E-05 | 0.01267226 | -2.1378642 | 0.401726 | 0.9999755 |
| PAX7       | 1  | 18631006..18748866                   | 1.137103618 | 0.867683567 | 0.99997305  | 1.290191685 | 0.74037301 | 0.999973169 | 31.64414743 | 5.3688E-06 | 0.00245172 | -3.0311479 | 0.167246 | 0.9999755 |
| MT1E       | 16 | 56625475..56627112                   | 30.81486003 | 2.5985E-05  | 0.011381948 | -1.36401616 | 0.71595323 | 0.999973169 | 30.78601264 | 2.6202E-05 | 0.00815041 | 10.4739047 | 0.004059 | 0.2624217 |
| ZIC1       | 3  | 147393422..147510293                 | 5.375334134 | 0.039233129 | 0.703811052 | -3.16657426 | 0.15462706 | 0.999973169 | 29.00707118 | 2.3082E-05 | 0.00750627 | -14.226322 | 0.002186 | 0.1773757 |
| FAM24B     | 10 | complement<br>(122849078..122879641) | 18.36913438 | 0.000591664 | 0.096203611 | 15.3655869  | 0.00131064 | 0.22521866  | 26.73735849 | 0.00010255 | 0.02589394 | 38.6771708 | 1.52E-05 | 0.0048597 |
| PTPN20     | 10 | 46911396..47002488                   | 43.87080818 | 1.03917E-06 | 0.000810754 | 24.45941647 | 3.8228E-05 | 0.018647611 | 26.16660398 | 2.5929E-05 | 0.00815041 | 44.1467263 | 1.02E-06 | 0.0004974 |
| ISLR2      | 15 | 74100311..74138540                   | 1.019025628 | 0.978410941 | 0.99997305  | 1.585451039 | 0.50616047 | 0.999973169 | 24.21533568 | 3.2283E-06 | 0.00153978 | -1.344993  | 0.674819 | 0.9999755 |
| BAHCC1     | 17 | 81395475..81466332                   | 1.099989886 | 0.873489469 | 0.99997305  | 1.626739528 | 0.41498137 | 0.999973169 | 18.26767246 | 1.0035E-06 | 0.00055226 | -2.5066392 | 0.131072 | 0.9999755 |
| GBX2       | 2  | complement<br>(236165236..236168369) | 1.241968034 | 0.670425778 | 0.99997305  | 1.457034969 | 0.4598506  | 0.999973169 | 17.15594455 | 1.7838E-08 | 1.7403E-05 | 1.00324574 | 0.994956 | 0.9999755 |
| PAX5       | 9  | complement<br>(36833275..37034185)   | 2.613428489 | 0.202781569 | 0.985882281 | -1.44243767 | 0.62333891 | 0.999973169 | 15.73408176 | 0.00015992 | 0.03538441 | -4.4412862 | 0.057932 | 0.9504012 |
| LMX1B      | 9  | 126614443..126701032                 | 1.055012888 | 0.93576581  | 0.99997305  | 1.793330009 | 0.3774426  | 0.999973169 | 12.1055455  | 0.00014993 | 0.03426669 | 1.06090763 | 0.929277 | 0.9999755 |
| ZFP57      | 6  | complement<br>(29672392..29681110)   | 1.874873101 | 0.143142222 | 0.935809173 | 1.990013906 | 0.10941862 | 0.999973169 | 11.91608468 | 5.6856E-09 | 6.7794E-06 | 49.5923356 | 0        | 0         |
| GDF7       | 2  | 20666664..20679245                   | 1.941786627 | 0.318732159 | 0.99997305  | 1.321626717 | 0.68120593 | 0.999973169 | 11.85952282 | 0.00014628 | 0.03412648 | 1.86370002 | 0.355016 | 0.9999755 |
| AC005943.1 | 19 | complement<br>(1578339..1605445)     | 6.764554407 | 0.001419952 | 0.168378066 | 6.422473624 | 0.0019284  | 0.292943673 | 10.89262796 | 6.6175E-05 | 0.01820912 | 1.53412833 | 0.483138 | 0.9999755 |
| WNT10B     | 12 | complement<br>(48965340..48971763)   | 5.521122425 | 0.006099591 | 0.370865492 | 7.450088604 | 0.00123625 | 0.217489554 | 10.42284642 | 0.00015008 | 0.03426669 | 6.2165779  | 0.003503 | 0.2376865 |
| GDA        | 9  | 72114595..72257193                   | 4.617232453 | 0.000513807 | 0.08843273  | 2.615404053 | 0.02919331 | 0.999973169 | 9.190588204 | 4.6985E-07 | 0.0002966  | 2.47015072 | 0.040322 | 0.8493005 |
| PTPRB      | 12 | complement<br>(70515866..70637440)   | 1.493860712 | 0.475863103 | 0.99997305  | 1.227056353 | 0.71505085 | 0.999973169 | 8.755203473 | 9.6652E-05 | 0.02469576 | 1.46974822 | 0.491895 | 0.9999755 |
| ZNF559     | 19 | 9323772..9351162                     | 7.523884086 | 2.07395E-06 | 0.001343991 | 5.328046037 | 8.4148E-05 | 0.033445829 | 8.355266783 | 5.9658E-07 | 0.00035568 | 7.9015749  | 1.17E-06 | 0.0005598 |
| HIST2H2BF  | 1  | complement<br>(149782689..149812373) | 4.795306151 | 0.00048722  | 0.086423089 | 6.176790834 | 5.0201E-05 | 0.021989028 | 7.809215216 | 4.4543E-06 | 0.00207834 | 4.06821215 | 0.001952 | 0.1636139 |
| GSTM5      | 1  | 109711780..109775428                 | 6.055626949 | 0.000860651 | 0.124811887 | 5.347346281 | 0.001947   | 0.292943673 | 7.803070194 | 0.000143   | 0.03372845 | 7.84059771 | 0.000139 | 0.0279149 |
| SP8        | 7  | complement<br>(20782283..20786886)   | 1.129507539 | 0.776316855 | 0.99997305  | 1.155259962 | 0.73624468 | 0.999973169 | 7.375965407 | 2.9082E-06 | 0.00141863 | -1.6810019 | 0.227427 | 0.9999755 |
| ZNF578     | 19 | 52453576..52512154                   | 4.760595684 | 0.000450284 | 0.082602092 | 1.413448749 | 0.44377575 | 0.999973169 | 7.017550007 | 1.1544E-05 | 0.0045049  | 1.5646178  | 0.322216 | 0.9999755 |
| ZNF502     | 3  | 44712643..44723831                   | 6.229779911 | 2.11984E-05 | 0.009680469 | 4.598378433 | 0.00039735 | 0.105914545 | 6.813731672 | 8.2169E-06 | 0.00332752 | 4.73895441 | 0.000306 | 0.0497163 |
| C17orf51   | 17 | complement<br>(21428381..21574517)   | 5.259219855 | 4.91807E-05 | 0.01919209  | 4.377952018 | 0.00030755 | 0.084626172 | 6.361404506 | 6.041E-06  | 0.00264609 | 5.74879782 | 1.91E-05 | 0.005602  |
| CTAGE8     | 7  | complement<br>(144266701..144269288) | 4.475574455 | 0.001381774 | 0.165681682 | 3.801546033 | 0.00445889 | 0.525829956 | 6.052465128 | 0.00012036 | 0.02902595 | 4.58259237 | 0.001184 | 0.1190289 |

|            |    |                                      |             |             |             |             |            |             |             |            |            |            |          |           |
|------------|----|--------------------------------------|-------------|-------------|-------------|-------------|------------|-------------|-------------|------------|------------|------------|----------|-----------|
| VENTX      | 10 | 133237404..133241929                 | 1.647165985 | 0.25837444  | 0.99997305  | 1.37350168  | 0.47290785 | 0.999973169 | 5.895714192 | 5.6492E-05 | 0.01574666 | 1.168196   | 0.725576 | 0.9999755 |
| ZNF880     | 19 | 52369917..52385795                   | 3.635909346 | 1.44433E-05 | 0.007045354 | 2.252269616 | 0.00650351 | 0.667870367 | 5.268390447 | 2.3256E-08 | 2.1702E-05 | 3.0511498  | 0.000183 | 0.0346832 |
| ZNF630     | X  | complement<br>(47983356..48071658)   | 4.620105269 | 0.000376264 | 0.072754546 | 3.603359781 | 0.00304639 | 0.399149536 | 5.070716318 | 0.00016336 | 0.03577684 | 4.219495   | 0.000872 | 0.1001224 |
| ZNF585B    | 19 | complement<br>(37181579..37218153)   | 4.597120814 | 1.63479E-11 | 3.89862E-08 | 3.970367047 | 1.2305E-09 | 3.30124E-06 | 4.995881178 | 1.2508E-12 | 3.2942E-09 | 3.79769417 | 4.31E-09 | 4.874E-06 |
| CCDC152    | 5  | 42756801..42802360                   | 4.400788377 | 4.29322E-07 | 0.000383939 | 3.36032194  | 3.6161E-05 | 0.018315259 | 4.504369588 | 2.8461E-07 | 0.00019705 | 4.42794579 | 3.92E-07 | 0.0002142 |
| NANOGP8    | 15 | complement<br>(35084193..35085110)   | 2.550860767 | 0.001880909 | 0.198866702 | 1.488325411 | 0.18766594 | 0.999973169 | 4.422695594 | 7.8918E-07 | 0.00045779 | 2.35607917 | 0.004479 | 0.2788152 |
| TNRC18     | 7  | complement<br>(5306790..5425414)     | 1.634888594 | 0.118968926 | 0.905102764 | 1.595314714 | 0.13875669 | 0.999973169 | 4.414220539 | 2.3897E-06 | 0.0011928  | 1.61345139 | 0.129646 | 0.9999755 |
| PCDHB15    | 5  | 141245349..141249365                 | 2.946337403 | 0.001806281 | 0.193841076 | 2.467697213 | 0.00919571 | 0.783204757 | 4.16477863  | 3.7532E-05 | 0.01134589 | 3.40358999 | 0.000408 | 0.0588041 |
| PKIB       | 6  | 122471917..122726373                 | 3.74502518  | 0.000174458 | 0.046562994 | 2.855493863 | 0.00286779 | 0.382306495 | 3.901470819 | 0.00010909 | 0.02722569 | 4.91044289 | 6.08E-06 | 0.0022023 |
| ZNF850     | 19 | complement<br>(36714383..36772825)   | 3.209650516 | 8.22964E-08 | 9.29646E-05 | 2.076861802 | 0.00079494 | 0.156994174 | 3.664372592 | 2.3603E-09 | 3.1662E-06 | 3.5977452  | 4E-09    | 4.773E-06 |
| PDGFA      | 7  | complement<br>(497258..520296)       | 1.645386009 | 0.047546708 | 0.740858034 | 1.362809886 | 0.21847215 | 0.999973169 | 3.582568975 | 3.7338E-07 | 0.00024284 | 1.28640669 | 0.31702  | 0.9999755 |
| SLC35E2A   | 1  | complement<br>(1724838..1745999)     | 1.503215451 | 0.183413389 | 0.968096399 | 2.647693044 | 0.00147454 | 0.243446455 | 3.557668068 | 3.3889E-05 | 0.0103909  | -1.0329474 | 0.915906 | 0.9999755 |
| CEBPZOS    | 2  | 37196488..37216193                   | 2.394120408 | 0.000336272 | 0.069680256 | 1.962726858 | 0.00563748 | 0.600117753 | 3.519122668 | 2.3549E-07 | 0.00016848 | 2.84033736 | 1.81E-05 | 0.0054798 |
| MLL16      | 17 | 38705542..38729803                   | 1.47760547  | 0.20156762  | 0.984804422 | 1.910003806 | 0.03425236 | 0.999973169 | 3.434409854 | 5.339E-05  | 0.01507787 | -1.5991361 | 0.126432 | 0.9999755 |
| SOCS2      | 12 | 93569814..93583487                   | 2.608184148 | 7.64676E-05 | 0.02449588  | 1.95946367  | 0.00555522 | 0.596158302 | 2.952336999 | 7.958E-06  | 0.00328467 | 2.11289557 | 0.002048 | 0.1683935 |
| AC011447.7 | 19 | complement<br>(20220597..20222186)   | 2.183417689 | 1.22182E-05 | 0.0060986   | 1.647939693 | 0.00525024 | 0.586905288 | 2.674363997 | 3.5781E-08 | 3.0719E-05 | 1.79008075 | 0.001145 | 0.1158892 |
| ZNF585A    | 19 | complement<br>(37106734..37172741)   | 2.131924748 | 0.000971456 | 0.138081838 | 1.813210773 | 0.00964146 | 0.789827317 | 2.49371319  | 6.846E-05  | 0.01859943 | 2.16576812 | 0.000774 | 0.0912576 |
| ARHGAP28   | 18 | 6729718..6915716                     | 1.8543541   | 0.001220177 | 0.158866948 | 1.517179216 | 0.02934248 | 0.999973169 | 2.288956976 | 1.4396E-05 | 0.00542089 | 1.54988847 | 0.022108 | 0.6529541 |
| PEG10      | 7  | 94656325..94669695                   | 1.510514076 | 0.011225186 | 0.478470145 | 1.235036472 | 0.19450154 | 0.999973169 | 2.264411186 | 5.0259E-07 | 0.0003082  | 1.58599774 | 0.004585 | 0.2811897 |
| NETO2      | 16 | complement<br>(47077703..47143997)   | 2.325478117 | 9.25005E-06 | 0.004726995 | 1.589802429 | 0.01512833 | 0.950382921 | 2.244294919 | 2.1964E-05 | 0.00725245 | 1.17747092 | 0.39362  | 0.9999755 |
| STOX2      | 4  | 183797692..184023526                 | 1.461335562 | 0.026820501 | 0.637508359 | 1.416351327 | 0.0423711  | 0.999973169 | 2.076989105 | 1.9643E-05 | 0.00665972 | 1.15272091 | 0.408132 | 0.9999755 |
| FAT3       | 11 | 92352096..92896470                   | 1.588830685 | 0.000411676 | 0.077507047 | 1.643418896 | 0.00015123 | 0.049178425 | 2.02923923  | 6.663E-08  | 5.2966E-05 | -1.1283258 | 0.358411 | 0.9999755 |
| HAPLN3     | 15 | complement<br>(88877288..88895626)   | 1.573302718 | 0.008796332 | 0.428997266 | -1.25066922 | 0.19590901 | 0.999973169 | -2.09548553 | 1.9494E-05 | 0.00665972 | -1.7503164 | 0.00123  | 0.1199607 |
| BEX2       | X  | complement<br>(103309346..103311046) | 1.441665154 | 0.033517754 | 0.676119886 | -1.36720863 | 0.06921618 | 0.999973169 | -2.13890438 | 1.0375E-05 | 0.00412387 | -1.2692075 | 0.166174 | 0.9999755 |
| NPIPA2     | 16 | 14748066..14765413                   | 2.397243462 | 5.75661E-05 | 0.021676168 | -1.55666534 | 0.0413415  | 0.999973169 | -2.40985263 | 5.3366E-05 | 0.01507787 | -1.5686055 | 0.038167 | 0.8268165 |
| JPH4       | 14 | complement<br>(23568035..23578800)   | 1.743257699 | 0.000536228 | 0.091341836 | -1.45114031 | 0.02036467 | 0.999973169 | -2.4193236  | 3.9754E-08 | 3.2817E-05 | -2.5599532 | 5.35E-09 | 5.746E-06 |
| PAPLN      | 14 | 73237497..73274640                   | 1.752620295 | 0.007752069 | 0.419099906 | -1.55219948 | 0.03699483 | 0.999973169 | -2.60717376 | 5.9082E-06 | 0.00264183 | -2.0278457 | 0.000824 | 0.096648  |
| TMEM151B   | 6  | 44270466..44307506                   | 1.579415974 | 0.038934505 | 0.702818574 | -1.33926266 | 0.18693482 | 0.999973169 | -2.61577473 | 1.4768E-05 | 0.00546494 | -2.1609027 | 0.000516 | 0.0683987 |

|            |    |                                          |                  |                  |                  |                  |                 |                  |                  |                 |                 |                 |               |                |
|------------|----|------------------------------------------|------------------|------------------|------------------|------------------|-----------------|------------------|------------------|-----------------|-----------------|-----------------|---------------|----------------|
| CAVIN3     | 11 | complement<br>(6318946..6320647)         | -<br>2.062627527 | -<br>0.003688333 | -<br>0.291039323 | -<br>-1.41478798 | -<br>0.16356639 | -<br>0.999973169 | -<br>-2.79781509 | -<br>3.929E-05  | -<br>0.01171214 | -<br>-2.1005453 | -<br>0.002982 | -<br>0.2154967 |
| APELA      | 4  | 164877004..164898965                     | 1.957188503      | 0.011498155      | 0.479193994      | -1.55023913      | 0.09894184      | 0.999973169      | -3.11995858      | 1.8768E-05      | 0.00664824      | -1.1194256      | 0.671092      | 0.9999755      |
| STC1       | 8  | complement<br>(23841915..23854807)       | -<br>3.221274543 | -<br>1.61861E-06 | -<br>0.001120653 | -<br>-3.41303619 | -<br>4.884E-07  | -<br>0.00055171  | -<br>-3.21506346 | -<br>1.696E-06  | -<br>0.00086669 | -<br>-2.1323368 | -<br>0.001903 | -<br>0.1601316 |
| ADRA2A     | 10 | 111077163..111080907                     | 4.065694981      | 0.000574615      | 0.095604382      | -2.39408265      | 0.03134115      | 0.999973169      | -6.02503858      | 1.2889E-05      | 0.00493994      | -2.6488131      | 0.016613      | 0.564826       |
| NPTX1      | 17 | complement<br>(80467148..80477843)       | -<br>3.618525942 | -<br>0.000184432 | -<br>0.048273962 | -<br>-3.89950978 | -<br>7.6205E-05 | -<br>0.030860262 | -<br>-7.05589272 | -<br>1.3828E-08 | -<br>1.4133E-05 | -<br>-3.2386365 | -<br>0.000635 | -<br>0.0810848 |
| RGPD1      | 2  | 86907953..87013976                       | 1.755610517      | 0.32124867       | 0.99997305       | -2.71515125      | 0.07994967      | 0.999973169      | -10.0308558      | 8.6554E-05      | 0.02265498      | 1.5654981       | 0.428104      | 0.9999755      |
| NPIPA8     | 16 | complement<br>(18317942..18336736)       | -<br>1.174200815 | -<br>0.795038898 | -<br>0.99997305  | -<br>1.369119656 | -<br>0.61097232 | -<br>0.999973169 | -<br>-12.423324  | -<br>8.822E-05  | -<br>0.02281297 | -<br>-14.532663 | -<br>4.09E-05 | -<br>0.0100964 |
| CES1       | 16 | complement<br>(55802851..55833337)       | -<br>12.69209632 | -<br>9.20771E-10 | -<br>1.41161E-06 | -<br>-2.20450611 | -<br>0.04632508 | -<br>0.999973169 | -<br>-14.1662061 | -<br>3.2195E-10 | -<br>4.6067E-07 | -<br>-1.4249462 | -<br>0.370553 | -<br>0.9999755 |
| DHRS2      | 14 | 23630115..23645639                       | 5.962220227      | 0.009416832      | 0.440334364      | -1.31140905      | 0.68962173      | 0.999973169      | -14.5410688      | 0.00015917      | 0.03538441      | -35.777157      | 3.17E-06      | 0.0013342      |
| RGPD2      | 2  | complement<br>(87755955..87825952)       | -<br>1.453874567 | -<br>0.614461166 | -<br>0.99997305  | -<br>-1.38270838 | -<br>0.66327678 | -<br>0.999973169 | -<br>-17.8679811 | -<br>0.00018072 | -<br>0.03917931 | -<br>4.76523583 | -<br>0.035455 | -<br>0.7976523 |
| AC008695.1 | 5  | complement<br>(131425891..131796983<br>) | -<br>1035.349249 | -<br>4.23661E-05 | -<br>0.016838956 | -<br>-9.76802075 | -<br>0.00877169 | -<br>0.762444052 | -<br>-176.630235 | -<br>1.5872E-06 | -<br>0.0008309  | -<br>-1060.8512 | -<br>0.000387 | -<br>0.0570694 |
| PEG3       | 19 | complement<br>(56810077..56840728)       | -<br>36.61107892 | -<br>0.000213331 | -<br>0.052628948 | -<br>-898.081439 | -<br>3.36E-10   | -<br>1.44332E-06 | -<br>-428.116793 | -<br>3.1091E-09 | -<br>3.9254E-06 | -<br>1.12489382 | -<br>0.903267 | -<br>0.9999755 |
| AL035078.4 | 11 | 31812391..32104665                       | 1.454269255      | 0.697626991      | 0.99997305       | -1.81055499      | 0.53826936      | 0.999973169      | -1250.49407      | 0.00011269      | 0.02779995      | -1268.8318      | 0.000385      | 0.0570694      |

## Supplementary Material and Methods

### List of Antibodies used in the study

| <b>Antibody</b>                    | <b>Catalog Number</b> | <b>Manufacturer</b>      |
|------------------------------------|-----------------------|--------------------------|
| Oct4 Rabbit                        | 09-0023               | Stemgent                 |
| Sox2 Rabbit                        | 09-0024               | Stemgent                 |
| Nanog Mouse                        | 4903                  | Cell Signaling           |
| Nanog Rabbit                       | 4893                  | Cell Signaling           |
| Klf4 Rabbit                        | ab215036              | Abcam                    |
| Klf4 Rabbit                        | ab151733              | Abcam                    |
| Lin 28A Rabbit                     | 3978                  | Cell Signaling           |
| Rex1 Mouse                         | sc-377095             | Santa Cruz               |
| TRA-1-60 Mouse                     | MAB4360               | Millipore                |
| TRA-1-81 Mouse                     | MAB4381               | Millipore                |
| GAPDH Mouse                        | A21994                | Invitrogen               |
| Alexa Fluor 488 Donkey Anti-Rabbit | A-21206               | Thermo Fisher Scientific |
| Alexa Fluor 488 Donkey Anti-Mouse  | A-21202               | Thermo Fisher Scientific |
| Alexa Fluor 555 Donkey Anti-Rabbit | A-31572               | Thermo Fisher Scientific |
| Alexa Fluor 555 Donkey Anti-Mouse  | A-31570               | Thermo Fisher Scientific |
| Donkey rabbit HRP                  | 711-035-152           | Jackson Immunological    |
| Donkey mouse HRP                   | 715-035-150           | Jackson Immunological    |

### Antibodies dilution used in immunocytochemistry procedure

| <b>Primary antibody</b> | <b>Dilution</b> | <b>Secondary antibody</b>          | <b>Dilution</b> |
|-------------------------|-----------------|------------------------------------|-----------------|
| Oct4 (rabbit)           | 1:500           | Alexa Fluor 488 Donkey Anti-Rabbit | 1:2000          |
| TRA1-60 (mouse)         | 1:200           | Alexa Fluor 555 Donkey Anti-Mouse  | 1:2000          |
| Sox2 (rabbit)           | 1:500           | Alexa Fluor 488 Donkey Anti-Rabbit | 1:2000          |
| TRA-1-81 (mouse)        | 1:200           | Alexa Fluor 555 Donkey Anti-Mouse  | 1:2000          |
| Nanog (mouse)           | 1:500           | Alexa Fluor 488 Donkey Anti-Mouse  | 1:2000          |
| Lin28A (rabbit)         | 1:500           | Alexa Fluor 555 Donkey Anti-Rabbit | 1:2000          |
| Klf4 (rabbit)           | 1:500           | Alexa Fluor 488 Donkey Anti-Rabbit | 1:2000          |
| Rex1 (mouse)            | 1:200           | Alexa Fluor 555 Donkey Anti-Mouse  | 1:2000          |

### List of Primers

| Primer name | Primer Sequence               |
|-------------|-------------------------------|
| hGAPDH F    | ACGACCACTTTGTCAAGCTCATTTTC    |
| hGAPDH R    | GCAGTGAGGGTCTCTCTCTTCCTCT     |
| hSOX2 F     | GGGAAATGGGAGGGGTGCAAAAGAGG    |
| hSOX2 R     | TTGCGTGAGTGTGGATGGGATTGGTG    |
| hOCT4 F     | GACAGGGGGAGGGGAGGAGCTAGG      |
| hOCT4 R     | CTTCCCTCCAACCAGTTGCCCAAAC     |
| hNANOG F    | CATGAGTGTGGATCCAGCTTG         |
| hNANOG R    | CCTGAATAAGCAGATCCATGG         |
| SeVF        | GGATCACTAGGTGATATCGAGC        |
| SeVR        | ACCAGACAAGAGTTTAAGAGATATGTATC |

### *RNA-Seq Library Preparation*

Library preparation started with purifying and fragmentation of mRNA process. In this process, poly-T oligo attached magnetic beads purified mRNA molecules that contained polyA using two rounds of purification. Through the second elution of polyA RNA, RNA sequences were fragmented and primed for cDNA synthesis. Then, synthesis of the first strand cDNA was achieved by reverse transcription process; where cleaved RNA fragments that were primed with random hexamers were reverse transcribed into cDNA strand by reverse transcriptase and random primers. To improve strand specificity, Actinomycin D was added to the First Stand Synthesis Act D mix (FSA), which allowed RNA-dependent synthesis and prevented forged DNA-dependent synthesis. Next, the second strand cDNA was synthesized by removing the RNA template and producing a replacement strand that incorporated dUTP in place of dTTP to generate the double stranded (ds) cDNA. By the end of this process, blunt-ended cDNA was obtained which further was adenylated from its 3' ends. In the adenylation process, a single 'A' nucleotide was added to the 3' ends of the blunt fragments, which would prevent them from ligating to each other during the reaction of adapter ligation. The corresponding 'T' nucleotide on the 3' end of the adapter provided a complementary extension for ligating the adapter to the fragment. During the process of adapters



ligation, multiple indexing adapters were ligated to the ends of the ds cDNA in preparation for hybridization onto a flow cell.

After that, PCR amplification using PCR Primer Cocktail that annealed to the ends of the adapters was used to selectively enrich DNA fragments that have adapter molecules on both ends which would increase the amount of DNA in the library. The generated libraries were validated by performing quality control analysis and quantification of DNA library templates. Quality control analysis was done using 2100 Bioanalyzer through the use of DNA-specific chip (Agilent DNA 1000); while libraries quantification was performed by Qubit assay.
